# Supplementary material for: Variations of China's emission estimates: response to uncertainties in energy statistics
Source: Copernicus journal article supplement (doi:10.5194/acp-17-1227-2017), 2017-01-25
Supplement: Supplementary file [file acp-17-1227-2017-supplement.pdf]

Supplement of Atmos. Chem. Phys., 17, 1227–1239, 2017  
<http://www.atmos-chem-phys.net/17/1227/2017/>  
doi:10.5194/acp-17-1227-2017-supplement  
© Author(s) 2017. CC Attribution 3.0 License.

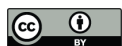

Atmospheric  
Chemistry  
and Physics  
Open Access  
EGU

*Supplement of*

## **Variations of China's emission estimates: response to uncertainties in energy statistics**

**Chaopeng Hong et al.**

*Correspondence to:* Qiang Zhang (qiangzhang@tsinghua.edu.cn)

The copyright of individual parts of the supplement might differ from the CC-BY 3.0 licence.

**Table S1. Energy consumption sectors in the energy statistics of NBS.**

---

| Sector                                                           |
|------------------------------------------------------------------|
| Thermal Power                                                    |
| Heating Supply                                                   |
| Farming, Forestry, Animal Husbandry, Fishery & Water Conservancy |
| Industry                                                         |
| Construction                                                     |
| Transport, Storage and Post                                      |
| Wholesale, Retail Trade and Hotel, Restaurants                   |
| Other                                                            |
| Residential Consumption - Urban                                  |
| Residential Consumption - Rural                                  |

---
